# Supplementary material for: Lewis acid effects on donor–acceptor associations and redox reactions: ternary complexes of heteroaromatic N-oxides with boron trifluoride and organic donors
Source: Royal Society of Chemistry journal article supplement (doi:10.1039/b9nj00205g), 2009-01-01
Supplement: b9nj00205g.pdf [file b9nj00205g.pdf]

## Supplementary Information Available for

### **Lewis Acid Effects on Donor/Acceptor Associations and Redox Reactions: Ternary Complexes of**

### **Heteroaromatic N-Oxides with Boron Trifluoride and Organic Donors**

Yakov Nizhnik, Jian Jiang Lu, Sergiy V. Rosokha, and Jay K. Kochi

*Department of Chemistry, University of Houston, Houston, TX, 77204*

IR spectral data for NQO and NPO N-oxides and their associates (Table S1 and S2), spectral characteristics of NPO and NQO and their complexes with  $\text{BF}_3$  in acetonitrile (Table S3), oxidation potentials of various organic donors and wavelength of charge-transfer bands of their complexes with  $\text{NPO}\cdot\text{BF}_3$  adducts (Table S4), reduction potentials of various organic acceptors and wavelength of charge-transfer bands of their complexes with pyrene and anthracene (Table S4) donor/acceptor stacking (Fig. S1), spectral deconvolution for NPO/anthracene solutions (Fig. S2), spectra of pyrene/NPO solutions (Fig. S3), spectra of  $\text{NXO}/\text{BF}_3$  solutions (Fig. S4), cyclic voltammograms of NPO, NQO and their mixtures with  $\text{BF}_3$  (Fig. S5), results of spectral titrations in the phenothiazine :  $\text{NXO} : \text{BF}_3$  systems (Fig. S6), illustration of oxygen hybridization (Fig. S7) and resonance contributors (Fig. S8) of N-oxide molecules, N-O-B angles in the reported N-oxide complexes (Table S6).

Table S1. IR-spectral data for NPO N-oxide, pyrene, and their associates

| pyrene | NPO     | (Pyrene) <sub>2</sub> ·NPO | NPO·BF <sub>3</sub> | pyrene·NPO·BF <sub>3</sub> · CH <sub>2</sub> Cl <sub>2</sub> |
|--------|---------|----------------------------|---------------------|--------------------------------------------------------------|
|        | 3114 w  | 3108 w                     | 3136, 3125 w        | 3133 w                                                       |
|        | 3078 w  | 3088 w                     | 3086 w              |                                                              |
| 3047 w | 3045 w  | 3048 w                     | 3075 w              | 3047 w                                                       |
|        | 3027 w  | 3027 w                     | 3051 w              |                                                              |
|        | 1602 m  | 1598 w                     | 1618 w              | 1598 m                                                       |
|        | 1585 w  | 1583 w                     | 1612 w              | 1596 w                                                       |
|        |         | 1522 w                     | 1545 s              | 1546 s                                                       |
|        | 1508 s  | 1509 s                     | 1484 m              | 1485 w                                                       |
|        | 1460 m  | 1464 m                     | 1449 w              | 1434 w                                                       |
| 1433 w |         | 1435 w                     | 1355 m              | 1357 m                                                       |
|        | 1364 w  | 1345 m                     | 1251 s              | 1265 w                                                       |
|        | 1345 vs | 1334 m                     | 1214 w              | 1241 m                                                       |
|        | 1284 m  | 1291 m                     | 1180 m              | 1185 w                                                       |
|        | 1269 vs | 1284 vs                    | 1113 s              |                                                              |
|        | 1232 w  | 1244 w                     | 1149 s              | 1165 m                                                       |
| 1184 w |         | 1185 w                     | 1127 w              |                                                              |
|        | 1174m   | 1171 m                     | 1109 w              |                                                              |
|        | 1170 m  |                            |                     |                                                              |
|        | 1122 s  | 1113 s                     | 1080 s              |                                                              |
|        | 1096 m  | 1097 w                     | 1043 w              | 1073 w                                                       |
|        | 1018 w  | 1024 w                     | 1008 w              |                                                              |
| 963 w  | 960 w   | 962 w                      | 977 m               | 962 m                                                        |
|        | 876 w   |                            | 953 m               | 958 m                                                        |
|        | 862 s   | 868 w                      | 937 m               | 929 m                                                        |
| 837 vs |         | 845 vs                     | 911 s               | 911 m                                                        |
| 819 w  | 829 w   | 821 w                      | 882 m               | 875 m                                                        |
| 748 m  | 749 m   | 760, 753 m                 | 871 s               | 865 s                                                        |
| 708 vs |         | 713 vs                     | 836 w               | 849 m                                                        |
|        | 680 m   | 679 w                      |                     | 837 vs                                                       |
|        |         |                            | 748 w               | 749 m                                                        |
|        |         |                            | 739m                | 735m                                                         |
|        |         |                            | 735,5 m             | 731 m                                                        |
|        |         |                            |                     | 707 vs                                                       |
|        |         |                            | 681 m               | 676 m                                                        |

Table S2. IR-spectral data for NQO, NQO·BF<sub>3</sub> and pyrene·NQO·BF<sub>3</sub>·CH<sub>2</sub>Cl<sub>2</sub>

| pyrene | NQO            | NQO·BF <sub>3</sub> | NQO·BF <sub>3</sub> ·(pyrene) <sub>2</sub> |
|--------|----------------|---------------------|--------------------------------------------|
|        | 3126 w         | 3131 w              | 3128 w                                     |
|        | 3099 w         | 3110 w              | 3100 w                                     |
| 3047 w | 1588 w         | 1620 w              |                                            |
|        | 1565 m         | 1604 w              | 1598 w                                     |
|        | 1518 s         | 1540 s              | 1540 m                                     |
|        | 1507.5 m       | 1521 w              | 1520 w                                     |
|        | 1498 w,        |                     |                                            |
|        | 1445 w         |                     |                                            |
|        | 1427 m-w       | 1435 w              | 1433 w                                     |
|        | 1388 m         | 1393 w              | 1396 w                                     |
| 1433 w | 1356 w         | 1364 sh             | 1369 sh                                    |
|        | 1342 m         | 1356 m              | 1360                                       |
|        | 1333 m         | 1339 m              | 1339 w                                     |
|        | 1297 sh. vs,   | 1274 w              | 1270 w                                     |
|        | 1293 vs        |                     |                                            |
|        | 1258 w         |                     |                                            |
|        | 1237 m         | 1223 w              | 1243 w                                     |
|        |                | 1203 w              |                                            |
| 1184 w | 1200 w         | 1207                | 1207 w                                     |
|        | 1163 w         | 1165 sh             |                                            |
|        | 1156 m, 1129 w | 1152 m, 1136 m      | 1140 m                                     |
|        | 1068 w         | 1113 w              | 1103 m                                     |
|        |                | 1074 s              | 1074 m                                     |
|        |                | 1054 m              | 1058 w                                     |
|        | 1030 w         | 1036 w              | 1033 w                                     |
|        | 1000 w         | 990 sh              |                                            |
|        | 988 w          | 981 w               | 985 w                                      |
| 963 w  | 967 w, 938 w   | 965 m, 940 w        | 961 w                                      |
|        | 926 w          | 915 s broad         | 918 w                                      |
|        | 876 w          | 873, 856 w          | 885 s broad                                |
| 837 vs | 836 sh, 829 s  | 834 s               | 845 vs                                     |
| 819 w  | 787 w          | 781 w               | 768 w                                      |
|        | 769 w          | 775 vs              | 768 m                                      |
| 748 m  | 764 vs         | 763 s               | 757 s                                      |
| 708 vs | 736 s,         | 723 w               | 724 w,                                     |
|        | 722 w          |                     | 711 vs                                     |

Table S3. Spectral characteristics of NPO and NQO N-oxides and its complexes with BF<sub>3</sub> in acetonitrile.

|                     | $\lambda_{\max}$ , nm (log $\epsilon$ ) |
|---------------------|-----------------------------------------|
| NPO                 | 237 (3.97), 344 (4.22)                  |
| NPO·BF <sub>3</sub> | 240 (4.02), 280 sh (3.59)               |
| NQO                 | 259 (4.22), 386 (4.11)                  |
| NQO·BF <sub>3</sub> | 242 (4.35), 330 (3.78)                  |

Table S4. Oxidation potentials of various organic donors and wavelength of charge-transfer bands of their complexes with NPO·BF<sub>3</sub> adducts

| Donor                    | $E_{\text{ox}}^{1/2}$ , V <sup>a)</sup> | $\lambda_{\max}$ , nm |
|--------------------------|-----------------------------------------|-----------------------|
| Octamethylbiphenylene    | +0.82                                   | 680                   |
| 9,10-Dimethylanthracene  | +0.94                                   | 580                   |
| 9,10-Dimethoxyanthracene | +0.98                                   | 550                   |
| Anthracene               | +1.09                                   | 511                   |
| Pyrene                   | +1.16                                   | 500                   |
| 1,4-dimethoxybenzene     | +1.35                                   | 455                   |
| Naphthalene              | +1.54                                   | 420                   |
| Hexaethylbenzene         | +1.59                                   | 406                   |
| Hexamethylbenzene        | +1.62                                   | 439                   |
| Penrtamethylbenzene      | +1.71                                   | 410                   |

a) From ref. 27

Table S5. Reduction potentials of various acceptor<sup>a</sup> and wavelength of charge-transfer bands of their complexes with anthracene and pyrene donors.

| Acceptor                                                      | $E_{\text{red}}$ ,<br>V vs SCE | $\lambda_{\max}$ , nm |             |
|---------------------------------------------------------------|--------------------------------|-----------------------|-------------|
|                                                               |                                | [Anthracene, A]       | [Pyrene, A] |
| 2,3-dichloro-5,6-dicyano- <i>p</i> -benzoquinone <sup>a</sup> | 0.52                           | 885                   | 840         |
| tetracyanoethylene <sup>a</sup>                               | 0.17                           | 718                   | 720         |
| tetracyanopyrazine                                            | -0.24                          | 580                   | 583         |
| <i>p</i> -bromanil                                            | -0.063                         | 634                   | 615         |
| tetracyanoquinodimethane <sup>a</sup>                         | 0.19                           | 763                   | 739         |
| <i>p</i> -chloranil <sup>a</sup>                              | -0.02                          | 635                   | 612         |
| <i>o</i> -chloranil                                           | 0.15                           | 679                   | 653         |
| <i>o</i> -bromanil                                            | 0.083                          | 690                   | 664         |
| 2,3-dicyano- <i>p</i> -benzoquinone                           | 0.257                          | 747                   | 724         |
| tetrafluorotetracyanoquinodimethane                           | 0.543                          | 990                   | 942         |
| trinitrobenzene                                               | -0.6 <sup>b</sup>              | 446                   | 439         |
| 2,6-dichloro- <i>p</i> -benzoquinone                          | -0.194                         | 555                   | 536         |
| <i>p</i> -fluoranil                                           | -0.07                          | 593                   | 571         |
| tropilium                                                     | -0.18 <sup>b</sup>             | 538                   | 537         |
| 2,3-dibromo-5,6-dicyano- <i>p</i> -benzoquinone               | 0.5                            | 879                   | 846         |

a) From ref. 27; b) From R. Rathore, S.V. Lindeman and J.K.Kochi, *J. Am. Chem. Soc.* **1997**, *119*, 9393.

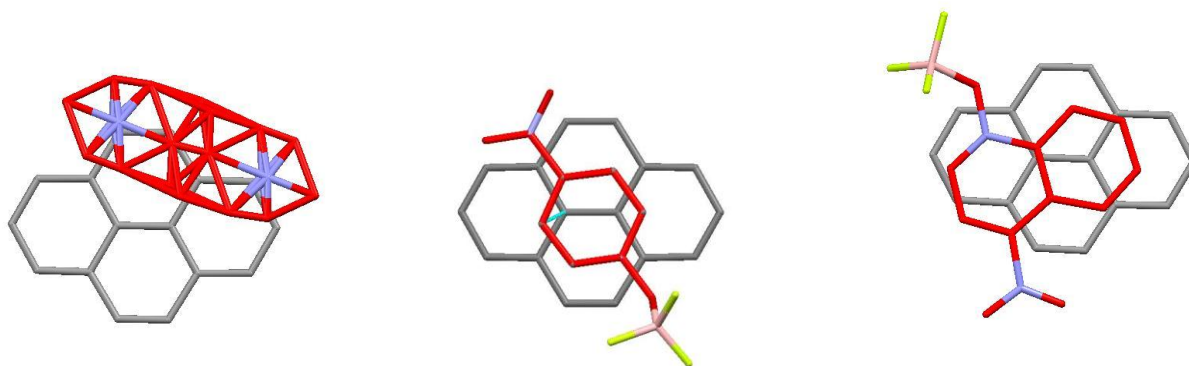

Fig. S1. Donor/acceptor stacking in A) (pyrene)<sub>2</sub>·NPO; B) pyrene·NPO·BF<sub>3</sub> and C) (pyrene)<sub>2</sub>·NQO·BF<sub>3</sub> salts.

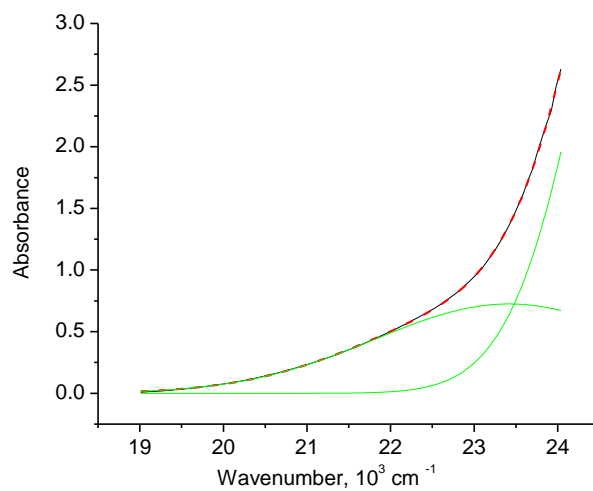

Fig. S2. Spectral deconvolution of the low-energy absorption (black) of the solution containing mixture of NPO and anthracene (see Fig. 1B) in dichloromethane

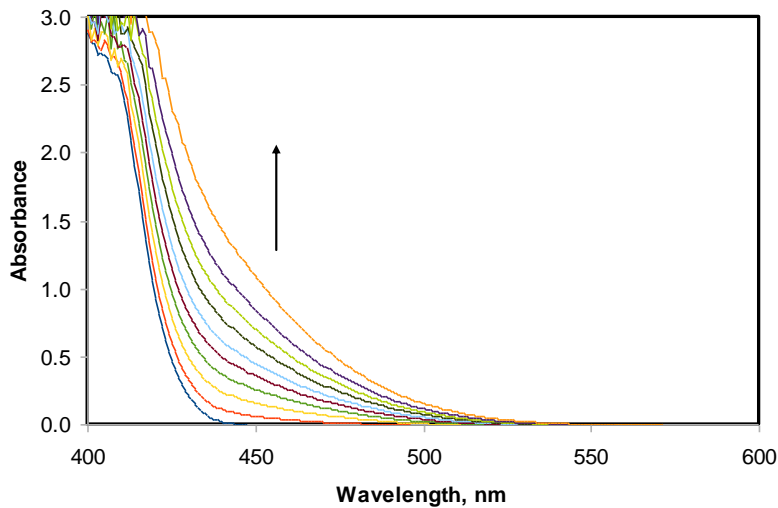

Fig. S3. Spectral changes occurring upon addition of pyrene to the solution of NPO in dichloromethane

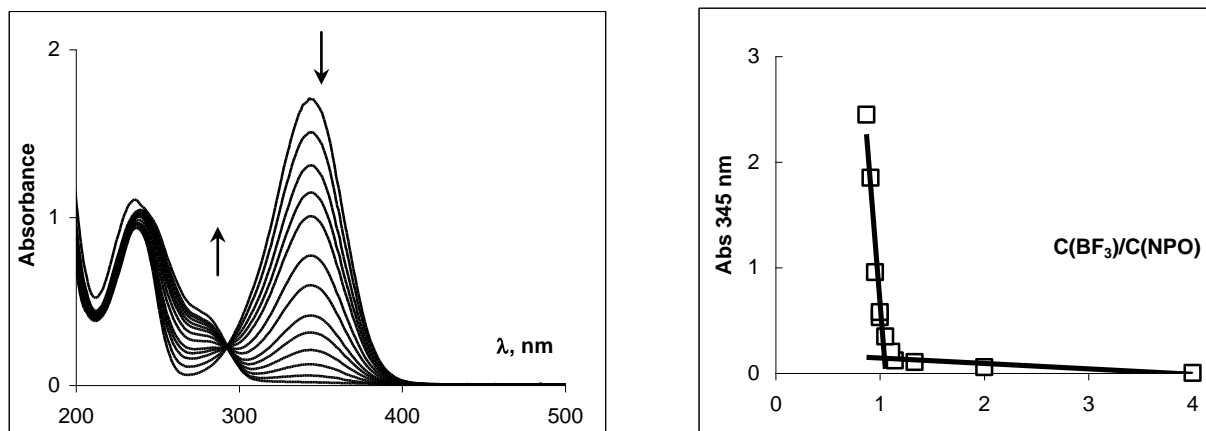

Fig. S4. Spectral changes occurring upon addition of  $\text{BF}_3$  to the 0.1 mM solution of NPO in acetonitrile (left) and upon titration of NPO with  $\text{BF}_3$  in dichloromethane (indicating the ratio  $\text{BF}_3/\text{NPO} = 1$ ).

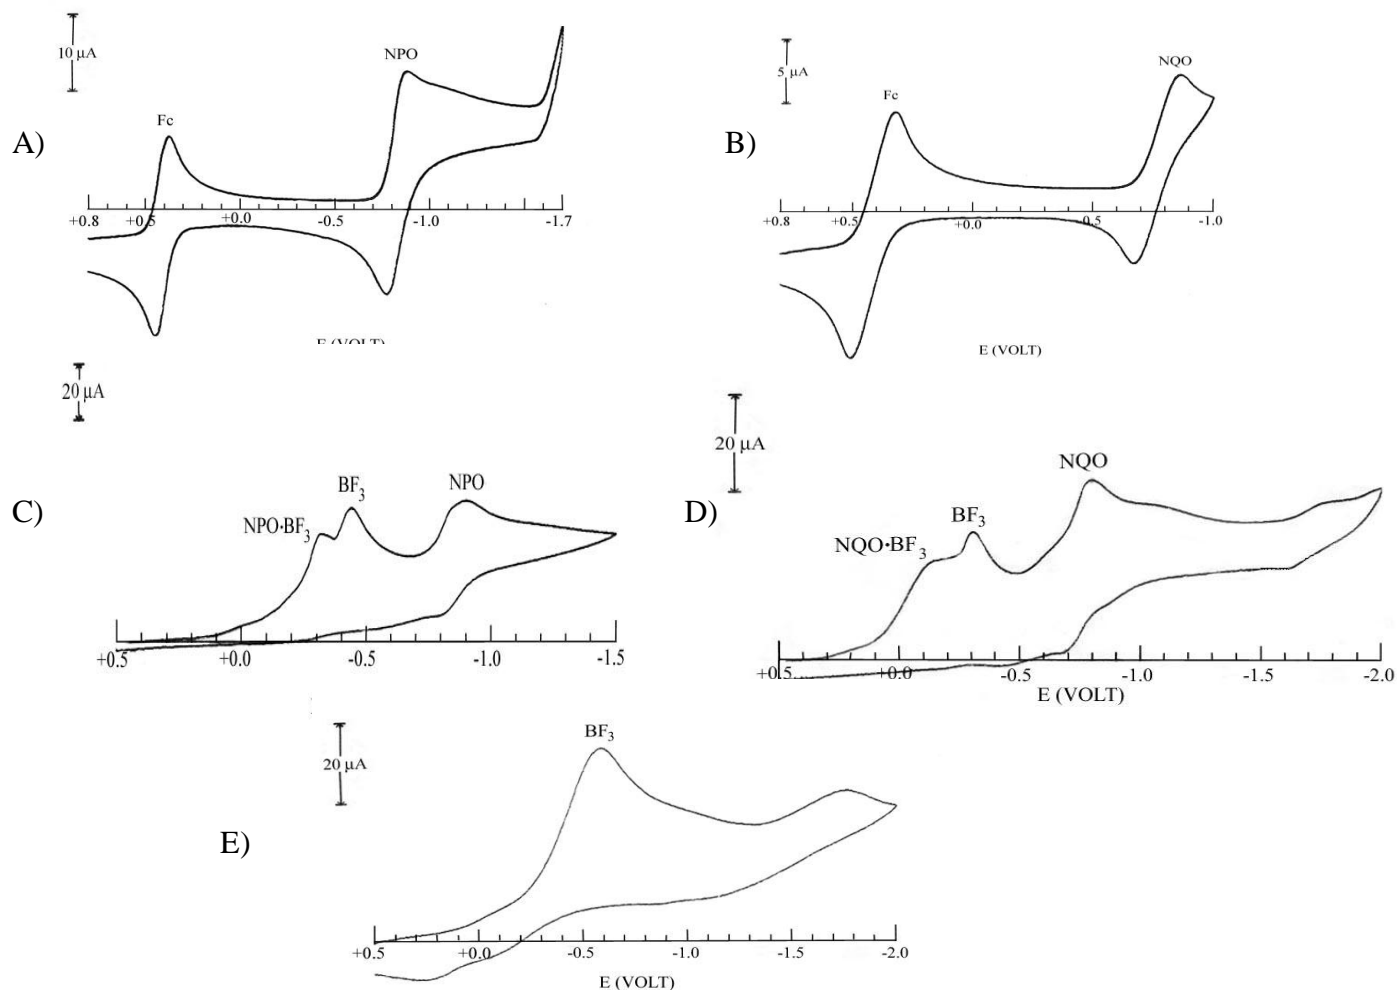

Fig. S5. Cyclic voltammograms of the dichloromethane solutions of NPO (A) and NQO (B) mixture of NPO and BF<sub>3</sub> (C) mixture of NQO and BF<sub>3</sub> (D) and BF<sub>3</sub> (E). (Note that first waves in Figures A and B correspond to Fc<sup>+</sup>/Fc internal standard).

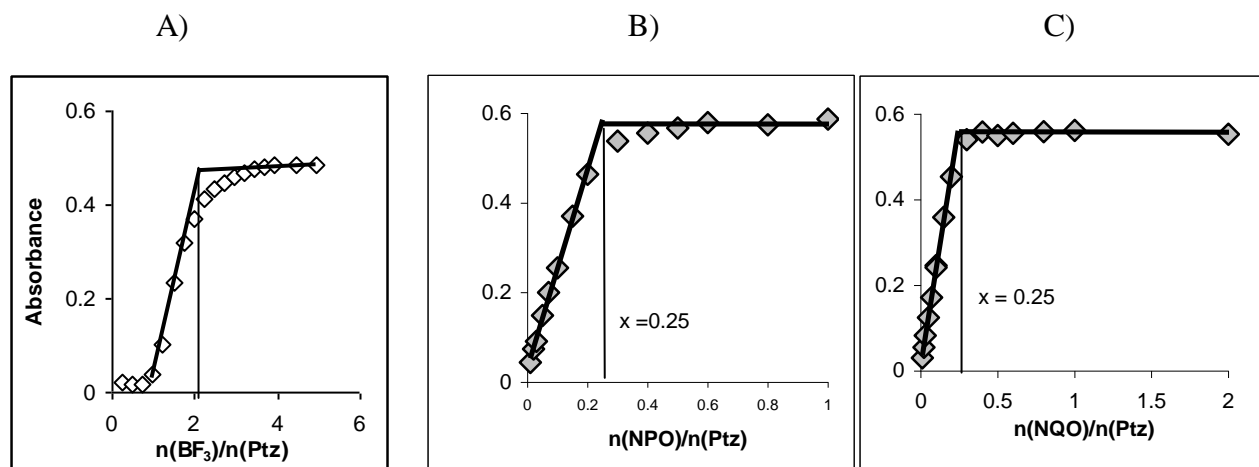

Fig. S6. Absorbance ( $\lambda = 745$  nm) of the solutions with various PTZ:NQO:BF<sub>3</sub> ratios which indicate: (A) stoichiometric ratio BF<sub>3</sub>/PTZ = 2 ( $C_{PTZ} = C_{NPO} = 6.4$  mM and various concentration of BF<sub>3</sub>), (B) stoichiometric ratio PTZ/NPO = 4 ( solutions with  $C_{PTZ} = 0.75$  mM,  $C_{BF_3} = 0.015$  M and various concentrations of NPO); and (C) stoichiometric ratio PTZ/NQO = 4 (solutions with  $C_{PTZ} = 0.75$  mM,  $C_{BF_3} = 0.015$  M and various concentrations of NQO). Note that absorption was measured in dichloromethane ( $l = 0.1$  cm) 24 h after component mixing, and  $\lambda = 745$  nm corresponds to band maximum of phenothiazine cation radical.

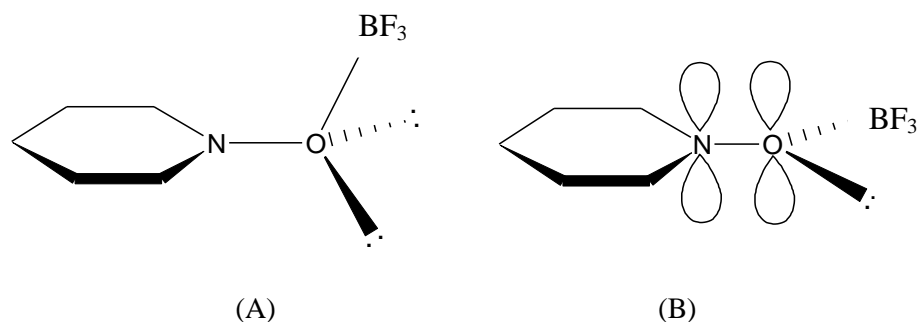

Fig. S7. Illustration of  $\text{BF}_3$ -coordinated N-oxide molecules with  $\text{sp}^3$  (A) and  $\text{sp}^2$  (B) hybridization of oxygen atoms which shows that the C-N-O-B dihedral angle is close to zero in A, while steric and electronic factors favor staggered conformation and large dihedral angle in B. Note that the use of N-O-B angle as the indicator of the oxygen hybridization is hindered by its sensitivity to steric factors. Indeed, the data in Table S6 demonstrate that analogous angles in the complexes of N-oxide of trimethylamine with various acceptors approach 109,5 deg (characteristic for  $\text{sp}^3$ -hybridization) only in the case of HCl, and in many cases these angles exceed 120 deg.

Table S6. Reported N-O-A angles for complexes of trimethylamine N-oxide with various acceptors

| N | Acceptor                             | CSD refcode | angle, deg |
|---|--------------------------------------|-------------|------------|
| 1 | -                                    | TMEAMO      | -          |
| 2 | HCl                                  | TMOHCL      | 109.88     |
|   |                                      | TMOHCL01    | 110.40     |
| 3 | Pentachlorophenol                    | WOLZUS      | 104.26     |
| 4 | Pentachlorophenol · H <sub>2</sub> O | WOMBAB      | 107.79     |
| 5 | Al(CH <sub>3</sub> ) <sub>3</sub>    | WAWKEK      | 127.21     |
| 6 | ZnCl <sub>2</sub>                    | TAPHAT      | 124.56     |
|   |                                      |             | 122.06     |
| 7 | ZnBr <sub>2</sub>                    | TAPHEX      | 124.75     |
| 8 | ZnI <sub>2</sub>                     | FIQBIQ      | 124.99     |
| 9 | CoI <sub>2</sub>                     | TAPGUM      | 125.25     |

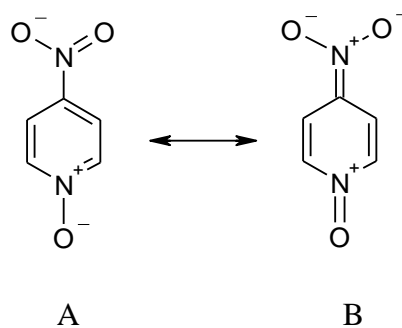

Fig. S8. Benzenoid (A) and quinonoid (B) contributors to the 4-nitro-N-oxide structure.
